## The well-being and work-related stress of senior school leaders in Wales and Northern Ireland during the COVID-19 pandemic: A cross-sectional descriptive study

Emily Marchant<sup>1</sup> ¶\*, Joanna Dowd<sup>2</sup> &, Lucy Bray<sup>3</sup> &, Gill Rowlands<sup>4</sup> &, Nia Miles<sup>5</sup> &, Tom Crick<sup>1</sup> &, Michaela James<sup>6</sup> &, Kevin Dadaczynski<sup>7,8</sup> &, Orkan Okan<sup>9,10</sup> &

<sup>1</sup> Department of Education and Childhood Studies, Faculty of Humanities and Social Sciences, Swansea University, United Kingdom

<sup>2</sup> Health Researcher (Freelance), Northern Ireland, United Kingdom

<sup>3</sup> School of Nursing, Midwifery and Allied Health, Faculty of Health, Social Care and Medicine, Edge Hill University, United Kingdom

<sup>4</sup> Public Health Sciences Institute, Newcastle University, United Kingdom

<sup>5</sup> National Academy for Educational Leadership Wales, United Kingdom

<sup>6</sup> National Centre for Population Health and Wellbeing Research, Population Data Science, Faculty of Medicine, Health and Life Science, Swansea University, United Kingdom

<sup>7</sup> Department of Health Sciences, Fulda University of Applied Sciences, Germany

<sup>8</sup> Centre for Applied Health Sciences, Leuphana University Lüneburg, Germany

<sup>9</sup> School of Medicine and Health, Department of Sport and Health Sciences, Center for Health and Medicine in Society, Munich, Germany

<sup>10</sup> School of Medicine and Health, Department of Sport and Health Sciences, Center for Health Promotion in Childhood and Adolescence, Munich, Germany

\*Corresponding author

Email: [E.K.Marchant@swansea.ac.uk](mailto:E.K.Marchant@swansea.ac.uk)

¶ These authors contributed equally to this work.

& These authors also contributed equally to this work.

## 1 Abstract

2 The COVID-19 pandemic caused far-reaching societal changes, including significant educational impacts, affecting  
3 over 1.6 billion pupils and 100 million education practitioners globally. Senior school leaders were at the forefront;  
4 an occupation already reporting high work-related stress and large numbers leaving the profession preceding  
5 COVID-19, leaders were exposed to high demands relating to the numerous challenges they had to manage during  
6 a “*crisis leadership*” period. This cross-sectional descriptive study through the international COVID-HL network  
7 aimed to examine the well-being and work-related stress of senior school leaders (n=323) in Wales (n=172) and  
8 Northern Ireland (n=151) during COVID-19 (2021-2022). Findings suggest that senior school leaders reported high  
9 workloads (54.22±11.30 hours/week), low well-being (65.2% n=202, mean WHO-5 40.85±21.57), depressive  
10 symptoms (WHO-5 34.8% n=108) and high work-related stress (PSS-10: 29.91±4.92). High exhaustion (BAT:  
11 high/very high 89.0% n=285) and specific psychosomatic complaints (experiencing muscle pain 48.2% n=151) were  
12 also reported, and females had statistically higher outcomes in these areas. School leaders were engaging in self-  
13 endangering working behaviours; 74.7% (n=239) gave up leisure activities in favour of work and 63.4% (n=202)  
14 sacrificed sufficient sleep, which was statistically higher for females. These findings are concerning given that the  
15 UK is currently experiencing a “*crisis*” in educational leadership against a backdrop of pandemic-related pressures.  
16 Senior leaders’ high attrition rates further exacerbate this, proving costly to educational systems and placing  
17 additional financial and other pressures on educational settings and policy response. This has implications for  
18 senior leaders and pupil-level outcomes including health, well-being and educational attainment, requiring urgent  
19 tailored and targeted support from the education and health sectors. This is particularly pertinent for Wales and  
20 Northern Ireland as devolved nations in the UK, who are both implementing or contemplating major education  
21 system level reforms, including new statutory national curricula, requiring significant leadership, engagement and  
22 ownership from the education profession.

## 23 Introduction

24 The COVID-19 pandemic caused unprecedented changes in all areas of society. It required the implementation of  
25 an unprecedented range of public health measures to reduce social contacts and transmission of SARS-CoV-2.  
26 Across all educational settings and contexts this included changes to the delivery of learning, teaching and  
27 assessment, such as full or partial face-to-face closures, a move to hybrid and blended learning, and the  
28 introduction of a variety of measures upon the full return to education [1–6]. These significant and prolonged  
29 changes to the delivery of teaching and learning impacted all those within education, including pupils, educational  
30 support staff, teachers, and senior school leaders (e.g. headteachers, deputy headteachers, senior leadership  
31 team) [7]. At its peak, over 1.6 billion learners and 100 million educational practitioners globally were affected by  
32 disruption to education [8].

33 Research efforts were initially focused on the impacts of the pandemic on school children and teaching staff [8].  
34 However, senior school leaders were at the forefront of educational leadership, who were required to navigate  
35 an evolving working situation and environment. This required rapid decision-making, school management and  
36 leadership relating to the numerous new protocols and policies they had to master and manage. Senior school  
37 leaders are responsible for all aspects of school life and therefore had to cope with high demands due to the  
38 COVID-19 pandemic, a period defined as “*crisis leadership*” [9,10]. Responsibilities included rapidly responding to  
39 government guidelines, managing communication with education authorities and the school community, ensuring  
40 professional development and continuity of learning and safeguarding vulnerable children.

41 Prior to COVID-19, concerns were raised regarding educational leaders’ workload, well-being, recruitment and  
42 retention within the profession [11,12] and experts had referred to a “potential crisis in leadership in education”  
43 [13]. It is well documented that educational leaders are prone to high levels of work-related stress, burnout, and  
44 reduced well-being, reporting higher stress levels than other occupations and the general population [14–17].  
45 Furthermore, evidence suggests gender differences exist in perceptions of stress and exhaustion, with female

46 school leaders exhibiting higher perceived stress [18] and symptoms of exhaustion and fatigue compared to their  
47 male counterparts [19]; further research is required to examine this in the context of COVID-19.

48 These existing pressures on educational leaders were exacerbated during the COVID-19 pandemic in a time that  
49 required “*constant crisis and change management*” [20]. This was fuelled further by intense scrutiny of school  
50 leaders by policymakers, parents and the media, in addition to a shift from local to national decision making and  
51 accountability [21]. These psychological and physical impacts can transcend to learners, with a body of evidence  
52 demonstrating an association between school leadership quality and student outcomes, including achievement,  
53 health and well-being [22,23]. Thus, the additional work-related pressures during a period of “*crisis leadership*”  
54 are likely to have had significant impacts on educational leaders, and research is urgently required to assess these  
55 impacts to direct appropriate resources and support.

56 This cross-sectional descriptive study was conducted through the international *COVID Health Literacy* (COVID-HL)  
57 network [24]. The network was established in 2020 to enable collaborative and cross-country health literacy  
58 research and includes more than 150 researchers from over 60 countries. Through the COVID-HL network, a  
59 number of surveys were developed to examine the impact of the COVID-19 pandemic on educational settings,  
60 including the *COVID-19 School Principals Survey* [25], which has been administered in 17 countries to date [26–  
61 30]. This study aimed to examine the working situation, well-being and work-related stress of senior school leaders  
62 in Wales and Northern Ireland and explore gender differences as a whole sample during the COVID-19 pandemic  
63 2021 and 2022.

64

## 65 Materials and Methods

66 The *COVID-19 School Principals Survey* was administered in Wales between June and November 2021 and  
67 Northern Ireland between March and May 2022. This was part of an ongoing international study through the  
68 COVID-HL network, and the survey has been administered in 17 countries globally at the time of writing.

## 69 Sample and recruitment

70 Inclusion criteria were: any member of staff with a senior leadership position, recognised in the UK as senior  
71 leadership team (SLT). This includes the headteacher or deputy/assistant headteacher, in addition to members of  
72 the SLT with leadership or management responsibilities (e.g. head of school/department/subject area, or senior  
73 pastoral role such as pupil well-being). Senior leaders were required to be currently working within any primary  
74 (ages 3-11), secondary (ages 11-16) or special educational setting. A convenience sample of participants were  
75 recruited via email, social media and through education stakeholders. Recruitment in Wales was facilitated by  
76 HAPPEN (*Health and Attainment of Pupils in Primary Education*) Wales [31,32], a pan-Wales infrastructure that  
77 connects research with primary schools, directly aligning with the new *Curriculum for Wales* [33] (which is phasing  
78 in from September 2022) and its health and well-being area of learning and experience, alongside the increased  
79 policy prominence of health literacy. The recruitment period in Wales was from 1<sup>st</sup> June 2021 to 14<sup>th</sup> November  
80 2021. In addition, stakeholder support was received from the National Academy for Educational Leadership Wales  
81 [34] who distributed the survey through their networks. In Northern Ireland, the survey was emailed to all primary,  
82 post-primary and special schools, and a reminder was also sent to encourage uptake. The recruitment period in  
83 Northern Ireland was from 31<sup>st</sup> January 2022 to 31<sup>st</sup> May 2022. The survey was securely administered online via  
84 Microsoft Forms with a survey link emailed to participants. Participants received an information sheet detailing  
85 the study aims, objectives, their rights, including their right to withdraw and information regarding anonymity and  
86 confidentiality and were required to provide written informed consent, confirming that they had read the

87 information sheet and understood what participation involved. The survey took approximately 20-30 minutes to  
88 complete.

## 89 The COVID-19 School Principal Survey

90 The *COVID-19 School Principal Survey* [25] was designed by the international COVID-HL network and adapted for  
91 Wales and Northern Ireland (S1 and S2 Fig). It asks participants a range of questions regarding their work situation,  
92 including general work-related factors, health, well-being, work-related Sense of Coherence, exhaustion and  
93 psychosomatic complaints, self-endangering behaviour and perceived stress. The inclusion criteria for the survey  
94 are any senior leadership staff (headteacher, deputy headteacher, senior leadership team). A full copy of the  
95 survey is available in the S1 and S2 Fig.

## 96 Measures

### 97 Demographic characteristics

98 Data regarding demographic characteristics were collected, including gender (male, female, prefer not to say),  
99 type of school (primary, post-primary/secondary), specific leadership position at school (e.g. headteacher, deputy  
100 headteacher, senior leadership team e.g. with leadership, management or pastoral responsibilities), school size,  
101 percentage of pupils from different socioeconomic groups (self-defined as low, medium, high) and percentage of  
102 their pupils eligible for free school meals. Free school meals are used as a proxy measure of deprivation, eligibility  
103 criteria at the time of the study were any child living in a household which gets income-related benefits and has  
104 an annual income less than £7,400 in Wales [35] or £14,000 in Northern Ireland [36].

### 105 Work-related factors

106 Participants were asked questions regarding their workload, including their total weekly working hours, weekly  
107 teaching hours and changes in their workload compared to before the COVID-19 pandemic (higher, about the  
108 same, lower than before the COVID-19 pandemic).

## 109 General health

110 The subjective health of participants was examined using the WHO-endorsed item of the self-perception of health  
111 status, which asks about '*health in general*' [37]. This has been found to be associated with other health measures,  
112 use of health services and survival rate in adults. In the current study, participants responded to a single-item  
113 question '*How is your health in general?*' using a 5-point Likert scale (1-5) from '*Very good*' to '*Very bad*' [38].  
114 Lower mean values indicate better perceived general health.

## 115 Well-being

116 The 5-item *World Health Organization Well-being Index* (WHO-5) was used to measure the subjective  
117 psychological well-being of senior school leaders [39]. Participants were asked to indicate how they had been  
118 feeling in the past two weeks in relation to five statements, including '*I have felt cheerful and in good spirits*'.  
119 Responses followed a 6-point Likert scale and were scored from 0 (*None of the time*) to 5 (*All of the time*). These  
120 were summed to calculate a total raw score between 0 to 25, and this total raw score was multiplied by 4,  
121 providing a final WHO-5 score between 0 (complete absence of well-being) to 100 (highest imaginable level of  
122 well-being). Mean scores were calculated, in addition to binary variables, a cut-off score of  $\leq 50$  is indicative of low  
123 well-being [40], and  $\leq 28$  indicative of depressive symptoms [41].

## 124 Work-related Sense of Coherence

125 *Sense of Coherence* (SoC) is a framework which explains how people manage stressful situations to maintain their  
126 health and well-being. Work-related SoC is used as an indicator for the health-promoting quality of life at work. It  
127 consists of three concepts; comprehensibility (how an individual perceives their work situation as structured,  
128 consistent and coherent, as opposed to unpredictable and chaotic), manageability (how an individual perceives  
129 the availability of resources to cope with demands in the workplace) and meaningfulness (the extent to which a  
130 person perceives their work situation as worthy of commitment and involvement) [42]. Work-related SoC was  
131 captured using a 9-item scale with responses following a Likert scale (each item score ranging from 1-7) relating  
132 to how participants were finding their work situation. For the comprehensibility sub-scale (items 1, 3, 6 and 9),

133 items were '*Unmanageable - manageable*', '*Unstructured - unstructured*', '*Unclear - clear*' and '*Unpredictable -*  
134 *predictable*'. The manageability sub-scale (items 4 and 7) includes '*Impossible to influence – easy to influence*' and  
135 '*Uncontrollable - controllable*'. The meaningfulness sub-scale was captured in items '*Meaningless - meaningful*',  
136 '*Insignificant - significant*'. Total scores were summed, and the three sub-scales scores were summed, and mean  
137 values calculated. Higher values indicate a higher SoC.

## 138 **Exhaustion and psychosomatic complaints**

139 Work-related exhaustion was assessed using the short-form exhaustion items from the *Burnout Assessment Tool*  
140 (BAT) [43]. This asked participants to rate on a 5-item Likert scale from Never to Always (scored 1-5) three  
141 statements relating to how they were experiencing their work situation including '*At work, I feel mentally*  
142 *exhausted*'. For psychosomatic complaints, the following items from the BAT were assessed using the same Likert  
143 scale as above, asking participants how often they suffer from, for example, '*Palpitations and/or chest pain*'. Total  
144 scores and mean values for exhaustion and psychosomatic complaints were calculated, with higher scores  
145 indicating higher work-related fatigue or psychosomatic complaints. In addition, statistical norms based on  
146 percentiles derived from Schaufeli, De Witte and Desart [43] categorised the exhaustion sub-scale as low, average,  
147 high or very high.

## 148 **Self-endangering behaviour**

149 Participants' self-endangering behaviour, recognised as behaviours that may be functional to attaining work goals  
150 in response to coping with excessive working demands, but have a negative effect on longer-term health, well-  
151 being and ability to work were assessed. Three sub-scales of the subjective self-endangering work behaviour scale  
152 were used; the 6-item work extensification (extending working hours), 3-item work intensification (working at an  
153 increased pace and multitasking, whilst limiting break periods and work-related social interactions) and 3-item  
154 quality reduction (reducing the quality of work in reaction to excessive work demands). For each sub-scale,  
155 participants were asked in relation to the past three months, and responses were scored using a 5-point Likert  
156 scale from '*Never*' to '*Very often*'. Total scores and mean values were calculated for each sub-scale, with higher



157 values indicating higher self-endangering behaviours. Krause et al. [44] report very good reliability of the  
158 subjective self-endangering work behaviour scale and acceptable to good reliability within sub-scales.

## 159 Perceived stress

160 Perceived stress was captured using a 10-item measure based on the original *Perceived Stress Scale* by Cohen  
161 [45], adapted by Schneider et al. [46] and applied to the COVID-19 working context by Dadaczynski, Okan and  
162 Messer [25]. Participants were asked how often they had found aspects of their working situation in the last  
163 month, including '*Felt confident about your ability to handle your professional work-related problems caused by*  
164 *the COVID-19 pandemic*'. The 10-item adapted PSS consists of two sub-scales; *Perceived Helplessness* (items 1, 2,  
165 3, 6, 9, 10), which represents a lack of control of negative emotions, and *Perceived Self-Efficacy* (items 4, 5, 7, 8),  
166 how effective the person feels in coping with demands. A 5-item Likert scale scored responses were from 1  
167 ('*Never*') to 5 ('*Very often*'). A total score was summed by combining perceived helplessness item scores and the  
168 reverse scoring of perceived self-efficacy items. In addition, sub-scale total scores (perceived self-efficacy reverse  
169 scored) were calculated. Total mean and sub-scale values were calculated, higher values indicate higher perceived  
170 stress. High content and construct validity have been reported by Schneider et al. [46].

## 171 Data analysis

172 Data were handled using IBM SPSS Statistics (version 28) to calculate descriptive statistics describing frequencies  
173 and percentages, and independent samples t-tests explored differences between gender.

## 174 Ethics

175 This study received ethical approval from the Swansea University Medical School Research Ethics Committee  
176 (approval number: 2021-0043). All participants were required to provide written informed consent to participate  
177 in the study. Participants in Northern Ireland were made aware that due to the anonymous nature of the survey,  
178 they were not able to withdraw their data after pressing submit. For Wales, personal data (name and school) were  
179 collected for the purposes of data linkage, and participants were informed of their right to withdraw.

180

## 181 Results

### 182 Demographic characteristics

183 Table 1 and 2 present the demographic characteristics of study participants by whole sample, country (Table 1)  
 184 and gender (Table 2). In total, 323 school leaders participated in the *COVID-19 School Principal Study*, of which  
 185 172 were from Wales (53.25%) and 151 from Northern Ireland (46.75%) (Table 1). Of the whole sample, 67.5%  
 186 (n=216) were female. The sample consisted of 83.2% (n=253) primary schools, and 80.6% headteachers (n=257).  
 187 School-level demographic characteristics reported by participants show the mean and median number of students  
 188 at senior leaders' schools (357.48 ± 333.10, 240). The percentage of pupils in low, medium and high socioeconomic  
 189 groups within senior leaders' schools were reported (whole group; 43.17 ± 29.62, 46.19 ± 27.23, 7.70 ± 10.59).  
 190 The majority of senior leaders worked within schools with 0-20% of pupils eligible for free school meals (43.8%).

191 **Table 1: Demographic characteristics (whole sample, n=323, and by country)**

192

|                                     |                          | % (n)                     |              |                  |
|-------------------------------------|--------------------------|---------------------------|--------------|------------------|
|                                     |                          | mean ± standard deviation |              |                  |
|                                     |                          | Whole sample              | Wales        | Northern Ireland |
| <b>Total</b>                        |                          | 323                       | 172 (53.25%) | 151 (46.75%)     |
| <b>Gender</b>                       | <i>Male</i>              | 32.5% (104)               | 63 (37.3%)   | 41 (27.2%)       |
|                                     | <i>Female</i>            | 67.5% (216)               | 106 (62.7%)  | 110 (72.8%)      |
|                                     | <i>Prefer not to say</i> | <5                        | <5           | <5               |
| <b>School type</b>                  | <i>Primary</i>           | 83.2% (253)               | 130 (81.3%)  | 123 (85.4%)      |
|                                     | <i>Secondary</i>         | 16.8% (51)                | 30 (18.7%)   | 21 (14.6%)       |
| <b>Leadership position</b>          | <i>Headteacher</i>       | 80.6% (257)               | 133 (79.2%)  | 124 (82.1%)      |
|                                     | <i>Deputy</i>            | 8.2% (26)                 | 14 (8.3%)    | 12 (7.9%)        |
|                                     | <i>headteacher</i>       | 11.3% (36)                | 21 (12.5%)   | 15 (9.9%)        |
|                                     | <i>Senior leadership</i> |                           |              |                  |
| <b>Number of students in school</b> | <i>Mean</i>              | 357.48 ± 333.10           | 396 ± 360.55 | 314.21 ± 294.82  |
|                                     | <i>Median</i>            | 240                       | 250          | 220              |
|                                     | <i>0-200</i>             | 128 (40.1%)               | 57 (33.9%)   | 71 (47.0%)       |
|                                     | <i>201-400</i>           | 96 (30.1%)                | 54 (32.1%)   | 42 (27.8%)       |
|                                     | <i>401-600</i>           | 48 (15.0%)                | 29 (17.3%)   | 19 (12.6%)       |
|                                     | <i>601+</i>              | 47 (14.7%)                | 28 (16.7%)   | 19 (12.6%)       |

|                                                                      |                |               |               |               |
|----------------------------------------------------------------------|----------------|---------------|---------------|---------------|
| <b>Percentage of students in school from socioeconomic groups</b>    | <i>Low</i>     | 43.17 ± 29.62 | 44.28 ± 31.06 | 42.08 ± 28.20 |
|                                                                      | <i>Medium</i>  | 46.19 ± 27.23 | 46.64 ± 28.55 | 45.75 ± 25.98 |
|                                                                      | <i>High</i>    | 7.70 ± 10.59  | 7.56 ± 10.88  | 7.84 ± 10.32  |
| <b>Percentage of pupils in school eligible for free school meals</b> | <i>0-20%</i>   | 140 (43.8%)   | 84 (48.8%)    | 56 (37.1%)    |
|                                                                      | <i>21-40%</i>  | 116 (36.3%)   | 67 (39.0%)    | 49 (32.5%)    |
|                                                                      | <i>41-60%</i>  | 40 (12.5%)    | 15 (8.7%)     | 25 (16.6%)    |
|                                                                      | <i>61-80%</i>  | 20 (6.3%)     | <5            | 17 (11.3%)    |
|                                                                      | <i>81-100%</i> | 4 (1.3%)      | 0             | <5            |

193

194 **Table 2 Demographic characteristics (by gender)**

|                                                                      |                           | <b>% (n)</b>                     |                 |
|----------------------------------------------------------------------|---------------------------|----------------------------------|-----------------|
|                                                                      |                           | <b>mean ± standard deviation</b> |                 |
|                                                                      |                           | <b>Male</b>                      | <b>Female</b>   |
| <b>Total</b>                                                         |                           | 104 (32.2%)                      | 216 (66.9%)     |
| <b>School type</b>                                                   | <i>Primary</i>            | 70 (71.4%)                       | 182 (88.8%)     |
|                                                                      | <i>Secondary</i>          | 28 (28.6%)                       | 23 (11.2%)      |
| <b>Leadership position</b>                                           | <i>Headteacher</i>        | 81 (79.4%)                       | 175 (81.0%)     |
|                                                                      | <i>Deputy headteacher</i> | 7 (6.9%)                         | 19 (8.8%)       |
|                                                                      | <i>Senior leadership</i>  | 14 (13.7%)                       | 22 (10.2%)      |
| <b>Number of students in school</b>                                  | <i>Mean</i>               | 449.47 ± 397.49                  | 309.54 ± 288.28 |
|                                                                      | <i>Median</i>             | 340                              | 220             |
|                                                                      | <i>0-200</i>              | 32 (31.4%)                       | 96 (44.4%)      |
|                                                                      | <i>201-400</i>            | 30 (29.4%)                       | 66 (30.6%)      |
|                                                                      | <i>401-600</i>            | 14 (13.7%)                       | 33 (15.3%)      |
|                                                                      | <i>601+</i>               | 26 (25.5%)                       | 21 (9.7%)       |
| <b>Percentage of students in school from socioeconomic groups</b>    | <i>Low</i>                | 37.70 ± 26.49                    | 45.77 ± 30.81   |
|                                                                      | <i>Medium</i>             | 49.71 ± 24.66                    | 44.47 ± 28.37   |
|                                                                      | <i>High</i>               | 8.84 ± 10.80                     | 7.19 ± 10.49    |
| <b>Percentage of pupils in school eligible for free school meals</b> | <i>0-20%</i>              | 47 (45.6%)                       | 92 (42.6%)      |
|                                                                      | <i>21-40%</i>             | 41 (39.8%)                       | 75 (34.7%)      |
|                                                                      | <i>41-60%</i>             | 11 (10.7%)                       | 29 (13.4%)      |
|                                                                      | <i>61-80%</i>             | 4 (3.9%)                         | 16 (7.4%)       |
|                                                                      | <i>81-100%</i>            | 0                                | <5              |

195

196 Tables 3 and 4 present the descriptive statistics of senior leaders' working situation, well-being and work-related  
 197 stress by whole sample, country (Table 3) and gender (Table 4). The distribution of responses can be viewed in  
 198 the S3 Fig. Complete cases are presented, and responses with a minimum of five participants' data are presented  
 199 for purposes of anonymity.

200

201 **Table 3: Descriptive statistics of senior leaders' well-being, working situation and work-related stress (whole**  
 202 **sample, country)**

|                                             |                             | % (n)                     |               |                  |
|---------------------------------------------|-----------------------------|---------------------------|---------------|------------------|
|                                             |                             | Mean ± standard deviation |               |                  |
|                                             |                             | Whole sample              | Wales         | Northern Ireland |
| <b>Working situation</b>                    | <i>Teaching hours</i>       | 10.29 ± 14.97             | 7.12 ± 13.14  | 13.85 ± 16.09    |
|                                             | <i>Workload hours</i>       | 54.22 ± 11.30             | 54.93 ± 11.33 | 53.43 ± 11.26    |
| <b>Workload compared to before COVID-19</b> | <i>Lower</i>                | 12 (3.8%)                 | 8 (4.9%)      | <5               |
|                                             | <i>About the same</i>       | 91 (29.0%)                | 65 (39.9%)    | 26 (17.2%)       |
|                                             | <i>Higher</i>               | 211 (67.2%)               | 90 (55.2%)    | 121 (80.1%)      |
| <b>General health</b>                       | <i>Good/very good</i>       | 226 (69.9%)               | 135 (79.4%)   | 91 (60.3%)       |
|                                             | <i>Mean</i>                 | 2.09 ± 0.86               | 1.91 ± 0.81   | 2.27 ± 0.87      |
| <b>WHO-5</b>                                | <i>Mean</i>                 | 40.85 ± 21.57             | 44.93 ± 21.62 | 36.08 ± 20.59    |
|                                             | <i>Low well-being</i>       | 202 (65.2%)               | 91 (54.5%)    | 111 (77.6%)      |
|                                             | <i>Depressive symptoms</i>  | 108 (34.8%)               | 47 (28.1%)    | 61 (42.7%)       |
| <b>Sense of coherence</b>                   | <i>Mean</i>                 | 3.95 ± 1.21               | 4.16 ± 1.25   | 3.71 ± 1.13      |
|                                             | <i>Comprehensibility</i>    | 3.61 ± 1.26               | 3.83 ± 1.30   | 3.36 ± 1.16      |
|                                             | <i>Manageability</i>        | 3.33 ± 1.38               | 3.54 ± 1.42   | 3.10 ± 1.31      |
|                                             | <i>Meaningfulness</i>       | 4.83 ± 1.48               | 5.01 ± 1.49   | 4.58 ± 1.43      |
| <b>Exhaustion</b>                           | <i>Mean</i>                 | 3.74 ± 0.76               | 3.52 ± 0.80   | 4.00 ± 0.62      |
|                                             | <i>High/very high</i>       | 285 (89.0%)               | 138 (81.2%)   | 147 (98.0%)      |
| <b>Psychosomatic complaints</b>             | <i>Mean</i>                 | 2.70 ± 0.83               | 2.58 ± 0.85   | 2.83 ± 0.80      |
| <b>Self-endangering behaviour</b>           | <i>Work extensification</i> | 4.35 ± 0.55               | 4.33 ± 0.51   | 4.36 ± 0.59      |
|                                             | <i>Work intensification</i> | 4.20 ± 0.79               | 4.01 ± 0.84   | 4.42 ± 0.67      |
|                                             | <i>Quality reduction</i>    | 3.47 ± 0.76               | 3.31 ± 0.75   | 3.65 ± 0.73      |
| <b>Perceived stress</b>                     | <i>Total score</i>          | 29.91 ± 4.92              | 28.72 ± 6.00  | 31.30 ± 2.65     |
|                                             | <i>Helplessness</i>         | 19.23 ± 4.14              | 18.32 ± 4.95  | 20.28 ± 2.57     |
|                                             | <i>Self-efficacy</i>        | 10.67 ± 1.94              | 10.37 ± 2.12  | 11.01 ± 1.66     |

203

204 **Table 4: Descriptive statistics of senior leaders' well-being, working situation and work-related stress (gender)**

|                                             |                       | % (n)                     |               |
|---------------------------------------------|-----------------------|---------------------------|---------------|
|                                             |                       | mean ± standard deviation |               |
|                                             |                       | Male                      | Female        |
| <b>Total</b>                                |                       | 104 (32.2%)               | 216 (66.9%)   |
| <b>Working situation</b>                    | <i>Teaching hours</i> | 9.54 ± 14.33              | 10.69 ± 15.29 |
|                                             | <i>Workload hours</i> | 55.39 ± 10.87             | 53.63 ± 11.50 |
| <b>Workload compared to before COVID-19</b> | <i>Lower</i>          | 5 (5.1%)                  | 7 (3.3%)      |
|                                             | <i>About the same</i> | 30 (30.3%)                | 61 (28.5%)    |

|                                   |                             |              |               |
|-----------------------------------|-----------------------------|--------------|---------------|
|                                   | <i>Higher</i>               | 64 (64.6%)   | 146 (68.2%)   |
| <b>General health</b>             | <i>Good/very good</i>       | 72 (69.2%)   | 153 (70.8%)   |
|                                   | <i>Mean</i>                 | 2.07 ± 0.98  | 2.09 ± 0.84   |
| <b>WHO-5</b>                      | <i>Mean</i>                 | 42.9 ± 22.91 | 39.79 ± 20.90 |
|                                   | <i>Low well-being</i>       | 65 (63.7%)   | 137 (66.2%)   |
|                                   | <i>Depressive symptoms</i>  | 31 (30.4%)   | 77 (37.2%)    |
| <b>Sense of coherence</b>         | <i>Mean</i>                 | 3.90 ± 1.25  | 3.99 ± 1.18   |
|                                   | <i>Comprehensibility</i>    | 3.58 ± 1.34  | 3.64 ± 1.21   |
|                                   | <i>Manageability</i>        | 3.33 ± 1.39  | 3.34 ± 1.37   |
|                                   | <i>Meaningfulness</i>       | 4.69 ± 1.50  | 4.91 ± 1.45   |
| <b>Exhaustion</b>                 | <i>Mean</i>                 | 3.60 ± 0.83* | 3.81 ± 0.71*  |
|                                   | <i>High/very high</i>       | 87 (83.7%)   | 197 (91.6%)   |
| <b>Psychosomatic complaints</b>   | <i>Mean</i>                 | 2.39 ± 0.81* | 2.84 ± 0.80*  |
| <b>Self-endangering behaviour</b> | <i>Work extensification</i> | 4.21 ± 0.62* | 4.41 ± 0.50*  |
|                                   | <i>Work intensification</i> | 4.09 ± 0.84  | 4.25 ± 0.76   |
|                                   | <i>Quality reduction</i>    | 3.43 ± 0.81  | 3.48 ± 0.73   |
| <b>Perceived stress</b>           | <i>Mean</i>                 | 29.26 ± 5.56 | 30.21 ± 4.56  |
|                                   | <i>Helplessness</i>         | 18.56 ± 4.68 | 19.52 ± 3.79  |
|                                   | <i>Self-efficacy</i>        | 10.71 ± 2.06 | 10.66 ± 1.89  |

205 \* depicts statistically significant differences between groups

206

## 207 Working situation

208 The mean weekly workload for senior leaders in this sample was 54.22 ± 11.3 hours (Wales: 54.93 ± 11.33,  
 209 Northern Ireland: 53.43 ± 11.26), 76.8% (n=241) reported working at least 50 hours per week during COVID-19.  
 210 Weekly teaching responsibility was also reported as 10.29 ± 14.97 hours, differences between countries were  
 211 observed (Wales: 7.12 ± 13.14, Northern Ireland 13.85 ± 16.09 hours). Workload increased during the COVID-19  
 212 pandemic compared to before, this was reported by 67.2% (n=211) of the sample (Wales: 55.2%, n=90; Northern  
 213 Ireland: 80.1%, n=121).

## 214 General health

215 Senior leaders reported their perceived general health status, with 69.9% (n=226) responding that this was  
 216 good/very good (Wales: 79.4%, n=135; Northern Ireland: 60.3%, n=91). Male and female senior school leaders

217 reported similar perceived health status, with 69.2% (n=72) and 70.8 (n=153) reporting this as good/very good,  
218 respectively.

## 219 Well-being

220 Using the WHO-5, senior leaders' mean subjective psychological well-being was  $40.85 \pm 21.57$  (Wales:  $44.93 \pm$   
221  $21.62$ , Northern Ireland:  $36.09 \pm 20.59$ ). 62.5% (n=202) (Wales: 54.5%, Northern Ireland: 77.6%) were categorised  
222 as having low well-being using the cut-off score of  $\leq 50$  determined by Topp et al. [40] and 34.8% (n=108) (Wales:  
223  $28.1\%$ , n=47, Northern Ireland:  $42.7\%$ , n=61) were below the cut-off for depressive symptoms [41]. Male senior  
224 leaders reported higher subjective psychological well-being ( $42.9 \pm 22.9$ ) than female senior leaders ( $39.7 \pm 20.90$ ).  
225 Whilst there were minimal gender differences in being classified as having low well-being (males: 63.7%, n=65  
226 females: 66.2%, n=137), females reported higher depressive symptoms (37.2%, n=77) than males (30.4%, n=31).

## 227 Sense of Coherence

228 Findings regarding work-related SoC indicate that meaningfulness (the extent to which a work situation is seen as  
229 worthy of commitment and involvement) was rated the highest ( $4.83 \pm 1.48$ , Wales:  $5.01 \pm 1.49$ , Northern Ireland:  
230  $4.58 \pm 1.43$ ), followed by comprehensibility ( $3.61 \pm 1.26$ , Wales:  $3.83 \pm 1.30$ , Northern Ireland:  $3.36 \pm 1.16$ ), with  
231 manageability rated lowest of the three sub-scales ( $3.33 \pm 1.38$ , Wales:  $3.54 \pm 1.42$ , Northern Ireland:  $3.10 \pm 1.31$ ).  
232 High mean values indicate stronger SoC, which can suggest coping more efficiently with work stressors (overall  
233 SoC whole sample:  $3.95 \pm 1.21$ , Wales:  $4.16 \pm 1.25$ , Northern Ireland:  $3.71 \pm 1.13$ ). This trend was also observed  
234 between gender.

## 235 Exhaustion and psychosomatic complaints

236 Regarding exhaustion, mean values for the sample of senior leaders were  $3.74 \pm 0.76$ . (Wales:  $3.52 \pm 0.80$ ,  
237 Northern Ireland  $4.00 \pm 0.62$ ), and females ( $3.81 \pm 0.71$ ) reported significantly higher exhaustion compared to  
238 males ( $3.60 \pm 0.83$ ,  $t=-2.208$ ,  $p=0.029$ ). Applying the statistical norms proposed by Schaufeli, De Witte and Desart

239 [43] suggest that 89.0% (n=285) of senior leaders exhibit high/very high exhaustion (Wales: 81.2%, n=183,  
240 Northern Ireland: 98%, n=147), and gender differences (males: 83.7%, n=87, females: 91.6%, n=197).  
241 Further descriptive data (S3 Fig) shows that senior leaders from Wales and Northern Ireland report often/always  
242 feeling mentally exhausted (57.1% and 82%, respectively) and physically exhausted (37.1% and 77.7%,  
243 respectively). Exhaustion is a core symptom of work-related burnout, with secondary symptoms including  
244 psychosomatic complaints, that is experiencing physical symptoms that are attributed to or exacerbated by  
245 mental stress. Most notably, this included often/always experiencing muscle pain such as neck, shoulder and back  
246 (Wales: 39.5%, Northern Ireland: 58.2%) and headaches (Wales: 31.9%, Northern Ireland: 38.7%. Statistically  
247 significant gender differences were also observed, with female senior leaders reporting higher psychosomatic  
248 complaints (females:  $2.84 \pm 0.80$ , high/very: 41.2%, males:  $2.39 \pm 0.81$ , high/very high: 16.1%,  $t=-4.721$ ,  $p<0.001$ ).

## 249 Self-endangering behaviour

250 The self-endangering work behaviour scale [44] assessed three-sub scales; work extensification, work  
251 intensification and quality reduction was used. Regarding extensification of work (i.e. extending working hours),  
252 mean values for the senior leaders in this sample were  $4.35 \pm 0.55$ . The distribution of responses indicates that  
253 91.5% (n=293) reported to fairly often/very often worked extra hours in the previous three months, 74.7% (n=239)  
254 given up leisure activities in favour of work, and 63.4% (n=202) sacrificing sufficient sleep. Differences between  
255 genders were statistically significant ( $t=-2.879$ ,  $p=0.005$ ), with females reporting higher extensification of work  
256 than their male counterparts,  $4.41 \pm 0.50$  and  $4.21 \pm 0.62$ , respectively. For work intensification, that is, working  
257 at an increased pace and multitasking whilst limiting break periods and work-related social interactions [47], mean  
258 values were  $4.20 \pm 0.79$  (whole sample). The majority of senior leaders (fairly often/very often: 74.4%, n=239)  
259 reported to work at a pace they found burdensome, that cannot be sustained in the long term (81.3%, n=261),  
260 and they know it is not good for them (82.9%, n=266). The third sub scale, quality reduction, reducing the quality  
261 of work in reaction to excessive work demands, was rated the lowest by senior leaders (mean values;  $3.47 \pm 0.76$ ).

## 262 Perceived stress

263 Using the 10-item *Perceived Stress Scale* adapted to the COVID-19 working context for the purpose of this study,  
264 findings from the current study present total scores for the sample of senior leaders ( $29.91 \pm 4.92$ ), and sub-scales  
265 of perceived helplessness ( $19.23 \pm 4.14$ ), and perceived self-efficacy ( $10.67 \pm 1.94$ ). Gender differences suggest  
266 significantly greater perceived helplessness reported by females than males ( $19.52 \pm 3.79$  and  $18.56 \pm 4.68$ ,  
267 respectively,  $t=-1.996$ ,  $p=0.047$ ). Within items from this sub-scale, nearly half of females (49.6%) reported that  
268 they could not cope with all their work tasks (fairly often/very often) compared to 28.8% of males.

269

## 270 Discussion

271 This study aimed to examine the working situation, well-being and work-related stress of senior school leaders in  
272 Wales and Northern Ireland and explore gender differences during the COVID-19 pandemic between 2021 and  
273 2022. This is part of an ongoing international study through the COVID-HL network, with specific relevance to  
274 current and emerging policy and practice in Wales and Northern Ireland. Findings suggest that senior school  
275 leaders reported high workloads, low well-being, depressive symptoms and high work-related stress. Senior  
276 leaders also had high levels of exhaustion and psychosomatic complaints indicating burnout and were engaging  
277 in self-endangering working behaviours, these were significantly higher in female senior leaders. During the  
278 COVID-19 pandemic, senior school leaders were exposed to a period of “crisis leadership” [9]. Understanding the  
279 impact this had on specific aspects of school leaders' physical and mental health is important, allowing the  
280 education and health systems to respond with a targeted approach and appropriate resources. This evidence base  
281 can shape and inform policy and directly address the working situation and well-being experiences of leaders in  
282 the education system. The findings in the current study supports other work in this area both nationally [15,26–  
283 30,48]



284 The majority of senior leaders in this study reported low well-being, lower than the general adult population pre-  
285 pandemic [49] and COVID-HL international study data from Hong Kong [26,27] and Switzerland [28]. Elsewhere,  
286 reports from 2020 to 2022 suggest negative impacts of the sustained work-related pressures on senior leaders’  
287 well-being and mental health [15,50,51]. In this study, females exhibited higher depressive symptoms than males,  
288 reflecting global data that suggests existing gender disparities in the prevalence of depression widened further  
289 during COVID-19 [52]. Findings regarding the well-being and mental health of senior school leaders in this study  
290 have wider implications as evidence demonstrates associations between the well-being of educational  
291 practitioners and pupil-level outcomes, including health, well-being and educational attainment [53].

292 The large majority of senior leaders in this study reported a higher workload than before the pandemic and  
293 working at least 50 hours per week. UK-based educational practitioners work longer hours than their international  
294 colleagues [54], and headteachers in the UK reported to work 20 hours more per week during COVID-19 than  
295 classroom teachers [55]. These findings are concerning given that high workload has been identified as a key  
296 reason for staff considering leaving the profession [50], and headteacher retention rates were a concern pre-  
297 pandemic [11]. This has since been labelled a “crisis” in England, Wales and Northern Ireland [56]. Most recently,  
298 senior leaders in Wales and Northern Ireland have resorted to industrial action, citing workload, below-inflation  
299 pay awards and school funding as key concerns within the profession [57,58], suggesting these work-related  
300 pressures persist.

301 Coping mechanisms to high workload include engaging in self-endangering behaviours that are functional to  
302 attaining work goals but negatively affect longer-term health, well-being and ability to work [47]. In this study,  
303 senior leaders reported often giving up leisure activities in favour of work, sacrificing sufficient sleep and waiving  
304 breaks during the working day. This relates to the transactional stress model, which explains individuals’ cognitive  
305 and behavioural responses as coping mechanisms to manage internal or external perceived stressors [59]. Females  
306 were significantly more likely to report self-endangering behaviours, in agreement with research in Germany  
307 which found that females were more likely to show overcommitting behaviours within their role, overexerting

308 themselves through excessive work engagement [60]. Furthermore, interesting findings were reported within the  
309 Swiss teaching profession which found prolonging working hours mediates the relationship between work  
310 overload and exhaustion, thus, work extensification is used as a coping mechanism to high working demands [61].  
311 The majority of senior leaders reported that this level of work was burdensome, cannot be sustained in the long  
312 term and was not good for them. Whilst our findings are in line with international study data from Hong Kong,  
313 [27], the prevalence of self-endangering behaviours was higher in Wales and Northern Ireland. Given that high  
314 work-related pressures are still being reported in the UK [56], it is reasonable to assume that many senior leaders  
315 are still engaging in self-endangering behaviours as a mechanism to mediate the negative work-related stressors  
316 associated with continued high workloads and working conditions. Whilst necessary to fulfil working demands,  
317 this is not conducive to their health and well-being.

318 Increased workload and self-endangering behaviours can lead to burnout, a psychological syndrome caused by  
319 chronic job stressors [62], of which exhaustion is a core symptom [43]. Senior leaders in this study reported very  
320 high levels of exhaustion, this is supported by research nationally during COVID-19 which demonstrates that  
321 headteachers and senior leaders reported the highest exhaustion compared to other educational practitioners  
322 [48]. Exhaustion was also higher in the current study than in international COVID-HL data [30]. Our study also  
323 found statistically significant gender differences, with females exhibiting higher exhaustion. These gender  
324 differences in school leader populations have also been noted in Sweden [19]. In a review of the role of gender in  
325 workplace stress, Gyllensten and Palmer identified a number of contributing factors for females, including  
326 increased responsibility for domestic chores, work-family conflicts and additional caring responsibilities (e.g.  
327 childcare and elderly parents) [63]. Though this review is broad and considers multiple occupations and not solely  
328 senior school leaders, it offers insights into gender differences observed in this study and reflects wider societal  
329 gender expectations and norms.

330 Psychosomatic complaints, recognised as physical symptoms attributed to or exacerbated by mental stress, are  
331 considered secondary symptoms of burnout [43]. Senior leaders in this study also reported higher psychosomatic  
332 complaints than reported internationally [26], including higher frequencies of headaches and muscle pain (e.g.  
333 neck, shoulder, back), feeling mentally and physically exhausted and finding it difficult to recover their energy  
334 after a day of work.[30]. Again, significant gender differences were observed, with females reporting higher  
335 psychosomatic complaints. Senior leaders in this study may have been at risk of, or were experiencing burnout  
336 during the COVID-19 pandemic, as reported elsewhere in the UK during this time [48].

337 Further to this and building on the transactional stress model are findings relating to senior leaders' perceived  
338 stress, this is minimally lower in Wales and Northern Ireland than reported in Hong Kong [26], though significantly  
339 higher than those in Taiwan [29]. Outside of the COVID-HL international study, findings from Wales and Northern  
340 Ireland are also significantly higher than teachers elsewhere in the UK [64]. Higher perceived stress has been  
341 associated with other outcomes, including hormonal changes and disturbances to the menstrual cycle in women  
342 [65], with females in this study reporting higher perceived helplessness, insomnia [66] and accessing primary care  
343 services [67]. A framework that explains how people manage stressful situations to maintain their health and well-  
344 being, a *Sense of Coherence* (SoC) and work-related SoC are used to indicate the health-promoting quality of life  
345 at work [42]. Senior leaders in this study reported manageability as the lowest of the three sub-scales, suggesting  
346 they perceived inadequate resources available to cope with the demands of the pandemic. According to the job  
347 demands-resources model, job resources (physical, psychological, social or organizational) are a central  
348 component in achieving work goals, reducing job demands and negating the associated  
349 physiological/psychological impacts [68]. Within this theoretical model, it is proposed that adequate job resources  
350 can buffer the impact of job demands on job-related strains such as burnout. This emphasizes the importance of  
351 necessary personal, organisational and governmental support for senior leaders and could be one consideration  
352 in reducing levels of burnout.

353 Despite the numerous work-related challenges experienced by senior leaders in this study, meaningfulness, the  
354 extent to which a person perceives their work situation as worthy of commitment and involvement, was reported  
355 the highest. Senior leaders still valued their role and its contribution, this is supported elsewhere within qualitative  
356 work with educational practitioners remaining in challenging working situations who expressed a strong sense of  
357 social responsibility within their role [69]. Following a similar trend to other measures in this study, overall SoC  
358 was lower than comparable international study data [27,29]. Higher work-related SoC predicted higher subjective  
359 well-being scores in Hong Kong[27], and was associated with lower perceived stress and lower likelihood of  
360 depressive symptoms in Taiwan [29]. Thus, this indicates stronger SoC acting as a protective factor in the stress,  
361 well-being and mental health of senior school leaders, and factors to foster SoC, including adequate resources  
362 must be considered.

363 Ultimately, these findings regarding senior leaders' work-related stress and well-being are concerning, given that  
364 Wales and Northern Ireland are currently experiencing a "crisis" in educational leadership against a backdrop of  
365 pandemic-related pressures. Assumptions regarding 'bouncing back' have been short-lived; more recent evidence  
366 suggests these initial pandemic-related pressures have accumulated with prior strain experienced by senior  
367 leaders and are indeed long-lasting. This is supported by survey research from the most recent Headteacher  
368 Wellbeing Index in the UK which indicates that the stress levels of educational practitioners increased up to 2022  
369 [15], and evidence examining post-pandemic well-being and burnout from other fields such as healthcare  
370 highlights this further [70].

371 The high attrition rates of senior leaders and other educational practitioners further exacerbate this, proving  
372 costly to educational systems and placing additional financial and other pressure on educational settings and  
373 policy response. This not only has implications for senior leaders' well-being, work-related stress and issues  
374 regarding retention in the profession but also on pupil-level outcomes, including health, well-being and  
375 educational attainment [23,53,71].

376 This study expands current knowledge on the impacts of the COVID-19 pandemic and “*crisis leadership*” on  
377 educational leaders in Wales and Northern Ireland. Findings suggest that both tailored and targeted support from  
378 the education and health sectors and government are urgently required to improve and optimise the working  
379 conditions of senior leaders. Based on the findings from this study, we propose five recommendations for  
380 consideration based on lessons learnt and what may mitigate these issues in any future national crises:

381 i) A more strategic approach to supporting the well-being of educational leaders in Wales and Northern  
382 Ireland is essential, including joint working between the health/social care and education sectors to  
383 provide mental health support to senior leaders.

384 ii) In the short term, the mental health and well-being supports currently available from both the  
385 education and health/social care sectors should be more explicitly highlighted to senior school leaders.

386 iii) Further research into what mental health support and resources are needed at individual,  
387 organisational and systems level to better support senior leaders in their role.

388 iv) Greater clarity on the extent and quality of leadership development provision to specifically support  
389 leaders' well-being is needed. This is particularly important during periods of major education system-  
390 level reforms; leadership is critical to support school and system improvement and ensuring ownership  
391 by practitioners.

392 v) Further research charting changes over time in leaders' experience of their well-being can contribute  
393 to strengthening the evidence base in this area. This includes longitudinal research using both quantitative  
394 and qualitative methods, extending this research to include senior leaders from nursery and post-16  
395 educational settings and capturing this across the four nations of the UK to contribute to international  
396 data.

## 397 Strengths and limitations

398 This study builds on the evidence base of the impacts of the COVID-19 pandemic on educational settings and  
399 extends this to senior school leaders during a period of “*crisis leadership*” in Wales and Northern Ireland. This is  
400 part of a wider global study through the COVID-HL network, enabling international comparisons. There are  
401 limitations to consider when interpreting the findings from this study. Whilst efforts were made to invite a range  
402 of participants through publicly available school contact information and key education stakeholders to increase  
403 the response rate, this study reports results obtained from a convenience sample of participants that chose to  
404 complete the survey and may not represent the wider senior leadership population. Whilst this study extends our  
405 understanding of the impact on school leaders, other educational practitioners are likely to have experienced  
406 similar work-related pressures and capturing a wider range of roles and experiences would provide further context  
407 to school settings, further research is required here. There is potential for response bias, and the reporting of  
408 socially desirable responses. In addition, given the high levels of stress and exhaustion reported in this study,  
409 selection bias is possible, the sample consists of more females, and it may be possible that more stressed or  
410 exhausted female senior leaders may have chosen to participate in the survey. The cross-sectional self-report  
411 survey was administered to a convenience sample of senior leaders in Wales and Northern Ireland at different  
412 time points during the COVID-19 pandemic, thus, it would not be helpful to compare between countries. Further  
413 longitudinal research using both quantitative and qualitative methods is required, obtaining a representative  
414 sample and extending this research across the four nations of the United Kingdom.

## 415 Conclusions

416 Findings in this study suggest that senior school leaders in Wales and Northern Ireland reported high workloads,  
417 low well-being, depressive symptoms, and high work-related stress during the COVID-19 pandemic. Senior leaders  
418 also had high levels of exhaustion and psychosomatic complaints indicating burnout and were engaging in self-  
419 endangering working behaviours such as sacrificing sufficient sleep. Gender differences were observed, with

420 females reporting statistically higher exhaustion, psychosomatic complaints, and extensification of work (e.g.  
421 extending working hours) than their male counterparts. These findings are concerning, not least because concerns  
422 were raised prior to the pandemic regarding the well-being, mental health and working conditions of senior school  
423 leaders across the UK, with experts warning of a "*potential crisis in leadership in education*" due to the high  
424 numbers leaving the profession [4,10,13]. This has also been observed across other education sectors in the UK,  
425 especially higher education [5]. It is likely the COVID-19 pandemic exacerbated this, and further research is  
426 required to examine the long-term impacts across school-level and other educational settings and contexts. It is  
427 vital to understand the impact the COVID-19 pandemic had on specific aspects of school leaders' physical and  
428 mental health to enable the education and health systems to respond with a targeted approach and appropriate  
429 resources. This is especially relevant with all four nations of the UK having undergone, or are currently undergoing,  
430 major education system-level reforms [72], including new national curricula and qualifications — for example, the  
431 start of the new Curriculum for Wales from September 2022 onwards; leadership is critical to support school and  
432 system improvement, as well as ensuring ownership by practitioners [73]. This evidence base can thus shape and  
433 inform emerging policy and practice to directly address the working situation and well-being experiences of  
434 leaders in the education system.

## 435 Acknowledgements

436 The authors would like to thank the senior school leaders who gave up their time to participate in this research  
437 study, particularly during such a challenging period within their roles, we are grateful for their participation. We  
438 would like to thank the National Academy for Educational Leadership Wales for their support with this study.  
439 Finally, we would like to thank Professor Kevin Dadaczynski and Professor Orkan Okan for their invitation to join  
440 the COVID-HL network and their support and guidance with undertaking this research in Wales and Northern  
441 Ireland.

## 442 References

- 443 1. Crick T. Covid-19 and Digital Education: a Catalyst For Change? ITNOW. 2021 Feb 16;63(1):16–7.
- 444 2. Watermeyer R, Crick T, Knight C, Goodall J. COVID-19 and digital disruption in UK universities: afflictions  
445 and affordances of emergency online migration. *High Educ.* 2021;81:623–41.
- 446 3. Marchant E, Griffiths L, Crick T, Fry R, Hollinghurst J, James M, et al. COVID-19 mitigation measures in  
447 primary schools and association with infection and school staff wellbeing: An observational survey linked  
448 with routine data in Wales, UK. *PLoS One* [Internet]. 2022 Feb 1 [cited 2022 Jul 5];17(2):e0264023.  
449 Available from: <https://journals.plos.org/plosone/article?id=10.1371/journal.pone.0264023>
- 450 4. Hulme M, Beauchamp G, Clarke L, Hamilton L. Collaboration in Times of Crisis: Leading UK Schools in the  
451 Early Stages of a Pandemic. *Leadersh Policy Sch.* 2023 Jan 2;22(1):161–80.
- 452 5. Watermeyer R, Crick T, Knight C. Digital disruption in the time of COVID-19: learning technologists’  
453 accounts of institutional barriers to online learning, teaching and assessment in UK universities. *Int J Acad  
454 Dev.* 2022 Apr 3;27(2):148–62.
- 455 6. Marchant E, Todd C, James M, Crick T, Dwyer R, Brophy S. Primary school staff perspectives of school  
456 closures due to COVID-19, experiences of schools reopening and recommendations for the future: A  
457 qualitative survey in Wales. *PLoS One* [Internet]. 2021 Dec 2 [cited 2022 Jan 20];16(12):e0260396.  
458 Available from: <https://journals.plos.org/plosone/article?id=10.1371/journal.pone.0260396>
- 459 7. Meinck S, Fraillon J, Strietholt R. The impact of the COVID-19 pandemic on education: International  
460 evidence from the Responses to Educational Disruption Survey (REDS) [Internet]. 2022. Available from:  
461 <https://unesdoc.unesco.org/ark:/48223/pf0000380398>
- 462 8. UNESCO. One year into COVID-19 education disruption: Where do we stand? [Internet]. 2021. Available  
463 from: <https://www.unesco.org/en/articles/one-year-covid-19-education-disruption-where-do-we-stand>
- 464 9. McLeod S, Dulsky S. Resilience, Reorientation, and Reinvention: School Leadership During the Early  
465 Months of the COVID-19 Pandemic. *Front Educ.* 2021;6.
- 466 10. Hamilton L, Beauchamp G, Hulme M, Harvey JA, Clarke L. Challenges for school leadership and  
467 management in the four nations of the United Kingdom during the pandemic: conceptual shifts and  
468 implications for future thinking. In: *Research Handbook on Public Leadership*. Edward Elgar Publishing;  
469 2023. p. 80–96.



- 470 11. Welsh Government. Research Study on the Attractiveness of Teaching, and Retention of Teachers. 2019.
- 471 12. Support E. Teacher Wellbeing Index 2019. 2019.
- 472 13. Davies AJ, Milton E, Connolly M, Barrance R. Headteacher Recruitment, Retention and Professional  
473 Development in Wales: Challenges and Opportunities. *Wales J Educ [Internet]*. 2018 [cited 2023 Aug  
474 16];20(2):204–24. Available from: <https://doi.org/10.16922/wje.20.2.11>
- 475 14. Phillips S, Sen D, McNamee R. Prevalence and causes of self-reported work-related stress in head  
476 teachers. *Occup Med (Chic Ill)*. 2007 Aug 1;57(5):367–76.
- 477 15. Education Support. Teacher Wellbeing Index 2022 [Internet]. 2022. Available from:  
478 <https://www.educationsupport.org.uk/media/zoga2r13/teacher-wellbeing-index-2022.pdf>
- 479 16. Agyapong B, Obuobi-Donkor G, Burbach L, Wei Y. Stress, Burnout, Anxiety and Depression among  
480 Teachers: A Scoping Review. *Int J Environ Res Public Health*. 2022 Aug 27;19(17):10706.
- 481 17. Scott S, Limbert C, Sykes P. Work-related stress among headteachers in Wales: Prevalence, sources, and  
482 solutions. *Educ Manag Adm Leadersh*. 2021 Nov 15;174114322110546.
- 483 18. Lückner P, Kästner A, Hannich A, Schmeyers L, Lückner J, Hoffmann W. Stress, Coping and Considerations of  
484 Leaving the Profession—A Cross-Sectional Online Survey of Teachers and School Principals after Two  
485 Years of the Pandemic. *Int J Environ Res Public Health*. 2022;19(23).
- 486 19. Persson R, Leo U, Arvidsson I, Håkansson C, Nilsson K, Österberg K. Prevalence of exhaustion symptoms  
487 and associations with school level, length of work experience and gender: a nationwide cross-sectional  
488 study of Swedish principals. *BMC Public Health*. 2021;21(1).
- 489 20. Harris A, Jones M. COVID 19—school leadership in disruptive times. *Sch Leadersh Manag*. 2020;40(4):243–  
490 7.
- 491 21. Thomson P, Greany T, Martindale N. The trust deficit in England: emerging research evidence about  
492 school leaders and the pandemic. *J Educ Adm Hist*. 2021 Oct 2;53(3–4):296–300.
- 493 22. Dhuey E, Smith J. How important are school principals in the production of student achievement? *Can J*  
494 *Econ*. 2014;47(2).
- 495 23. Estyn. Healthy and happy School impact on pupils' health and wellbeing [Internet]. 2019 [cited 2023 Aug  
496 18]. Available from: <https://www.estyn.gov.wales/system/files/2022->

- 497 01/Healthy%2520and%2520Happy%2520report%2520En\_0.pdf
- 498 24. COVID-HL Network. COVID Health Literacy Network [Internet]. 2021 [cited 2023 Aug 18]. Available from:  
499 <https://covid-hl.eu/>
- 500 25. Dadaczynski K, Okan O, Messer M. COVID-19 Health Literacy School Principals Survey (COVID-HL: School  
501 Principal). Questionnaire and Scale Documentation. 2021.
- 502 26. Lau SSS, Shum ENY, Man JOT, Cheung ETH, Amoah PA, Leung AYM, et al. Teachers' Well-Being and  
503 Associated Factors during the COVID-19 Pandemic: A Cross-Sectional Study in Hong Kong, China. *Int J*  
504 *Environ Res Public Health*. 2022;19(22).
- 505 27. Lau SSS, Shum ENY, Man JOT, Cheung ETH, Amoah PA, Leung AYM, et al. A Cross-Sectional Study of the  
506 Perceived Stress, Well-Being and Their Relations with Work-Related Behaviours among Hong Kong School  
507 Leaders during the COVID-19 Pandemic. *Int J Environ Res Public Health*. 2022;19(23).
- 508 28. Betschart S, Sandmeier A, Skedsmo G, Hascher T, Okan O, Dadaczynski K. The Importance of School  
509 Leaders' Attitudes and Health Literacy to the Implementation of a Health-Promoting Schools Approach.  
510 *Int J Environ Res Public Health*. 2022 Nov 11;19(22):14829.
- 511 29. Duong T Van, Nguyen MH, Lai C-F, Chen S-C, Dadaczynski K, Okan O, et al. COVID-19-related fear, stress  
512 and depression in school principals: impacts of symptoms like COVID-19, information confusion, health-  
513 related activity limitations, working hours, sense of coherence and health literacy. *Ann Med*. 2022 Dec  
514 31;54(1):2064–77.
- 515 30. Leksy K, Wójciak M, Gawron G, Muster R, Dadaczynski K, Okan O. Work-Related Stress of Polish School  
516 Principals during the COVID-19 Pandemic as a Risk Factor for Burnout. *Int J Environ Res Public Health*.  
517 2023 Jan 1;20(1):805.
- 518 31. Todd C, Christian D, Tyler R, Stratton G, Brophy S. Developing HAPPEN (Health and Attainment of Pupils  
519 involved in a Primary Education Network): Working in partnership to improve child health and education.  
520 *Perspect Public Health*. 2016;136(3).
- 521 32. HAPPEN Wales. HAPPEN - Network [Internet]. 2023 [cited 2023 Aug 18]. Available from: [https://happen-](https://happen-wales.co.uk/)  
522 [wales.co.uk/](https://happen-wales.co.uk/)
- 523 33. Welsh Government. Curriculum for Wales - Hwb [Internet]. 2022 [cited 2023 Aug 18]. Available from:  
524 <https://hwb.gov.wales/curriculum-for-wales>

- 525 34. National Academy for Educational Leadership Wales. Home - National Leadership Wales [Internet]. 2023  
526 [cited 2023 Aug 18]. Available from: <https://nael.cymru/>
- 527 35. Welsh Government. Free School Meals in Wales: Information for Parents and Guardians [Internet]. 2019  
528 [cited 2020 Mar 30]. Available from: <https://gov.wales/free-school-meals-frequently-asked-questions>
- 529 36. Education Authority. Apply for Free School Meals / Uniform Grants | Education Authority Northern  
530 Ireland [Internet]. 2023 [cited 2023 Aug 18]. Available from: [https://www.eani.org.uk/financial-help/free-](https://www.eani.org.uk/financial-help/free-school-meals-uniform-grants/apply-for-free-school-meals-uniform-grants)  
531 [school-meals-uniform-grants/apply-for-free-school-meals-uniform-grants](https://www.eani.org.uk/financial-help/free-school-meals-uniform-grants/apply-for-free-school-meals-uniform-grants)
- 532 37. de Bruin A, Picavet HSJ, Nossikov A. Health interview surveys: towards international harmonization of  
533 methods and instruments. 1996.
- 534 38. Lampert T, Schmidtke C, Borgmann L-S, Poethko-Müller C, Kuntz B. Subjektive Gesundheit bei  
535 Erwachsenen in Deutschland. *J Heal Monit*. 2018;3(2).
- 536 39. World Health Organization. Wellbeing measures in primary health care/the DepCare Project: report on a  
537 WHO meeting: Stockholm, Sweden, 12–13 February 1998 [Internet]. Stockholm; 1998. Available from:  
538 <https://apps.who.int/iris/handle/10665/349766>
- 539 40. Topp CW, Dinesen Østergaard S, Søndergaard S, Bech P. The WHO-5 Well-Being Index: A Systematic  
540 Review of the Literature. *Pyschother Psychosom*. 2015;84:167–76.
- 541 41. Omani-Samani R, Maroufizadeh S, Almasi-Hashiani A, Sepidarkish M, Amini P. The WHO-5 Well-Being  
542 Index: A Validation Study in People with Infertility. *Iran J Public Health*. 2019 Nov;48(11):2058–64.
- 543 42. Vogt K, Jenny GJ, Bauer GF. Comprehensibility, manageability and meaningfulness at work: Construct  
544 validity of a scale measuring work-related sense of coherence. *SA J Ind Psychol*. 2013;39(1).
- 545 43. Schaufeli W, De Witte H, Desart S. BURNOUT ASSESSMENT TOOL 1 Version 2.0-July 2020. KU Leuven,  
546 Belgium; 2020.
- 547 44. Krause A, Baeriswyl S, Berset M, Deci N, Dettmers J, Dorsemagen C, et al. Selbstgefährdung als Indikator  
548 für Mängel bei der Gestaltung mobil-flexibler Arbeit: Zur Entwicklung eines Erhebungsinstrumentes.  
549 *Wirtschaftspsychologie* [Internet]. 2015;(4):49–59. Available from: [http://www.psychologie-](http://www.psychologie-aktuell.com/index.php?id=184&tx_ttnews%5Btt_news%5D=3833&tx_ttnews%5BbackPid%5D=185&cHash=d51d629405#marker4)  
550 [aktuell.com/index.php?id=184&tx\\_ttnews%5Btt\\_news%5D=3833&tx\\_ttnews%5BbackPid%5D=185&cHas](http://www.psychologie-aktuell.com/index.php?id=184&tx_ttnews%5Btt_news%5D=3833&tx_ttnews%5BbackPid%5D=185&cHash=d51d629405#marker4)  
551 [h=d51d629405#marker4](http://www.psychologie-aktuell.com/index.php?id=184&tx_ttnews%5Btt_news%5D=3833&tx_ttnews%5BbackPid%5D=185&cHash=d51d629405#marker4)
- 552 45. Cohen S, Kamarck T, Mermelstein R. A global measure of perceived stress. *J Health Soc Behav*.

- 553 1983;24(4).
- 554 46. Schneider EE, Schönfelder S, Domke-Wolf M, Wessa M. Measuring stress in clinical and nonclinical  
555 subjects using a German adaptation of the Perceived Stress Scale. *Int J Clin Heal Psychol* [Internet]. 2020  
556 May 1 [cited 2023 Jun 27];20(2):173–81. Available from: <https://pubmed.ncbi.nlm.nih.gov/32550857/>
- 557 47. Dettmers J, Deci N, Baeriswyl S, Berset M, Krause A. Self-endangering work behavior. In: *Healthy at Work: Interdisciplinary Perspectives*. 2016.
- 559 48. Sundaram N, Abramsky T, Oswald WE, Cook S, Halliday KE, Nguipdop-Djomo P, et al. Implementation of  
560 COVID-19 Preventive Measures and Staff Well-Being in a Sample of English Schools 2020-2021. *J Sch*  
561 *Health*. 2023 Apr 30;93(4):266–78.
- 562 49. Office for National Statistics. Measuring national well-being: international comparisons - Office for  
563 National Statistics [Internet]. 2019 [cited 2023 Aug 16]. Available from:  
564 [https://www.ons.gov.uk/peoplepopulationandcommunity/wellbeing/datasets/measuringnationalwellbei](https://www.ons.gov.uk/peoplepopulationandcommunity/wellbeing/datasets/measuringnationalwellbeinginternationalcomparisons)  
565 [nginternationalcomparisons](https://www.ons.gov.uk/peoplepopulationandcommunity/wellbeing/datasets/measuringnationalwellbeinginternationalcomparisons)
- 566 50. Education Support. Teacher Wellbeing Index 2020 [Internet]. 2020. Available from:  
567 [https://www.educationsupport.org.uk/media/yfrhfjca/teacher\\_wellbeing\\_index\\_2020.pdf](https://www.educationsupport.org.uk/media/yfrhfjca/teacher_wellbeing_index_2020.pdf)
- 568 51. Education Support. Teacher Wellbeing Index 2021 [Internet]. 2021. Available from:  
569 <https://www.educationsupport.org.uk/media/qzna4gxb/twix-2021.pdf>
- 570 52. Santomauro DF, Mantilla Herrera AM, Shadid J, Zheng P, Ashbaugh C, Pigott DM, et al. Global prevalence  
571 and burden of depressive and anxiety disorders in 204 countries and territories in 2020 due to the  
572 COVID-19 pandemic. *Lancet*. 2021 Nov;398(10312):1700–12.
- 573 53. Naghieh A, Montgomery P, Bonell CP, Thompson M, Aber JL. Organisational interventions for improving  
574 wellbeing and reducing work-related stress in teachers. *Cochrane Database Syst Rev*. 2015 Apr 8;
- 575 54. Allen R, Benhenda A, Jerrim J, Sims S. New evidence on teachers' working hours in England. An empirical  
576 analysis of four datasets. *Res Pap Educ*. 2021;36(6).
- 577 55. Jerrim J, Allen R, Sims S. How did the COVID-19 pandemic affect the wellbeing of teachers at work?  
578 [Internet]. 2022 [cited 2023 Aug 18]. Available from:  
579 [https://johnjerrim.files.wordpress.com/2022/11/working\\_paper\\_pandemic\\_nov\\_22\\_v3.pdf](https://johnjerrim.files.wordpress.com/2022/11/working_paper_pandemic_nov_22_v3.pdf)
- 580 56. NAHT. Gone for good: leaders who are lost to the teaching profession [Internet]. 2022. Available from:

- 581 <https://www.naht.org.uk/Portals/0/PDF's/Campaigns/NAHT-Retention-rate-report-FINAL.pdf>
- 582 57. Seith E. Welsh heads vote to continue industrial action over pay [Internet]. tes magazine. 2023. Available  
583 from: <https://www.tes.com/magazine/news/general/welsh-headteachers-vote-continue-industrial->  
584 [action-over-pay](https://www.tes.com/magazine/news/general/welsh-headteachers-vote-continue-industrial-action-over-pay)
- 585 58. Robbie Meredith. Teacher strikes: Five NI unions to take action on 26 April - BBC News. BBC News  
586 [Internet]. 2023 Apr 3 [cited 2023 Aug 18]; Available from: <https://www.bbc.co.uk/news/uk-65166921>
- 587 59. Lazarus RS, Folkman S. Transactional theory and research on emotions and coping. *Eur J Pers.* 1987;1(3).
- 588 60. Kreuzfeld S, Seibt R. Gender-Specific Aspects of Teachers Regarding Working Behavior and Early  
589 Retirement. *Front Psychol.* 2022;13.
- 590 61. Sandmeier A, Baeriswyl S, Krause A, Muehlhausen J. Work until you drop: Effects of work overload,  
591 prolonging working hours, and autonomy need satisfaction on exhaustion in teachers. *Teach Teach Educ.*  
592 2022;118.
- 593 62. Maslach C, Jackson SE. The measurement of experienced burnout. *J Organ Behav.* 1981 Apr;2(2):99–113.
- 594 63. Gyllensten K, Palmer S. The role of gender in workplace stress: A critical literature review. Vol. 64, *Health*  
595 *Education Journal.* 2005.
- 596 64. Butler N, Wilson C, Bates R, Quigg Z, Ashworth E. Sefton School Mental Wellbeing and Resilience Survey  
597 2021 [Internet]. 2021. Available from: [https://www.ljmu.ac.uk/-/media/phi-reports/pdf/2023-01-sefton-](https://www.ljmu.ac.uk/-/media/phi-reports/pdf/2023-01-sefton-school-mental-wellbeing-and-resilience-survey.pdf)  
598 [school-mental-wellbeing-and-resilience-survey.pdf](https://www.ljmu.ac.uk/-/media/phi-reports/pdf/2023-01-sefton-school-mental-wellbeing-and-resilience-survey.pdf)
- 599 65. Schliep KC, Mumford SL, Vladutiu CJ, Ahrens KA, Perkins NJ, Sjaarda LA, et al. Perceived Stress,  
600 Reproductive Hormones, and Ovulatory Function. *Epidemiology.* 2015 Mar;26(2):177–84.
- 601 66. Palagini L, Bruno RM, Cheng P, Mauri M, Taddei S, Ghiadoni L, et al. Relationship between insomnia  
602 symptoms, perceived stress and coping strategies in subjects with arterial hypertension: psychological  
603 factors may play a modulating role. *Sleep Med.* 2016 Mar;19:108–15.
- 604 67. Prior A, Vestergaard M, Larsen KK, Fenger-Grøn M. Association between perceived stress, multimorbidity  
605 and primary care health services: a Danish population-based cohort study. *BMJ Open.* 2018 Feb  
606 24;8(2):e018323.
- 607 68. Bakker AB, Demerouti E. The Job Demands-Resources model: State of the art. Vol. 22, *Journal of*

- 608            Managerial Psychology. 2007.
- 609    69.    Arthur L. What makes teachers decide to stay in challenging schools? | The British Academy [Internet].  
610            The British Academy. 2020 [cited 2023 Aug 18]. Available from:  
611            [https://www.thebritishacademy.ac.uk/blog/summer-showcase-2020-what-makes-teachers-decide-stay-](https://www.thebritishacademy.ac.uk/blog/summer-showcase-2020-what-makes-teachers-decide-stay-challenging-schools/)  
612            [challenging-schools/](https://www.thebritishacademy.ac.uk/blog/summer-showcase-2020-what-makes-teachers-decide-stay-challenging-schools/)
- 613    70.    Zhou T, Xu C, Wang C, Sha S, Wang Z, Zhou Y, et al. Burnout and well-being of healthcare workers in the  
614            post-pandemic period of COVID-19: a perspective from the job demands-resources model. BMC Health  
615            Serv Res. 2022 Dec 2;22(1):284.
- 616    71.    Roffey S. Pupil wellbeing -Teacher wellbeing: Two sides of the same coin? Educ Child Psychol.  
617            2012;29(4):8–17.
- 618    72.    Knight C, Conn C, Crick T, Brooks S. Divergences in the framing of inclusive education across the UK: a  
619            four nations critical policy analysis. Educ Rev. 2023 Jun 22;1–17.
- 620    73.    Harris A, Jones M, Crick T. Curriculum leadership: a critical contributor to school and system  
621            improvement. Sch Leadersh Manag. 2020 Jan 1;40(1):1–4.
- 622
